# Supplementary material
Source: Research Square preprint supplement (doi:10.21203/rs.3.rs-9901734/v1)
Supplement: Supplementary file 1 [file 739539ee641a61d6f8257543.docx]

**Circadian Regulation of miR-206-3p Impairs Nurr1-Dependent Dopaminergic Homeostasis and Promotes ADHD-Like Behaviors in Mice**

Yun Wang1,3† ,Linzi Wang2†, Siyi Li1†,Xueyin Liao1, Xin Ding 2*,Jian Huang1*

1 School of Basic Medical Sciences, Soochow University, Suzhou 215123, P. R. China.

2 Soochow Key Laboratory of Prevention and Treatment of Child Brain Injury, Children’s Hospital of Soochow University, Suzhou 215123, P. R. China.

3 Department of Clinical Laboratory, The Affiliated Guangji Hospital of Soochow University, Suzhou 215137, P. R. China.

Y.W. ，L.W. and S.L. contributed equally to this study.

* Correspondence:

Jian Huang, Ph.D.,

Department of medical genetics, School of Basic Medical Sciences, Soochow University, Suzhou 215123, P. R. China.

Email: huangjian79@suda.edu.cn.

ORCID (JH): 0000-0003-0026-2513

Xin Ding, Ph.D.,

Soochow Key Laboratory of Prevention and Treatment of Child Brain Injury, Children’s Hospital of Soochow University, Suzhou 215123, P. R. China.

Email: dingxin@suda.edu.cn

# Supplementary Figure

Supplementary Figure 1. Validation of AAV-mediated miR-206-3p overexpression in mouse brain.

(A) Immunofluorescence images showing AAV-mediated miR-206-3p overexpression after lateral ventricular injection. Green indicates GFP-positive viral expression, and red indicates nuclei. SN, substantia nigra. (B) qPCR validation of miR-206-3p overexpression in whole mouse brain. ****p<0.0001.


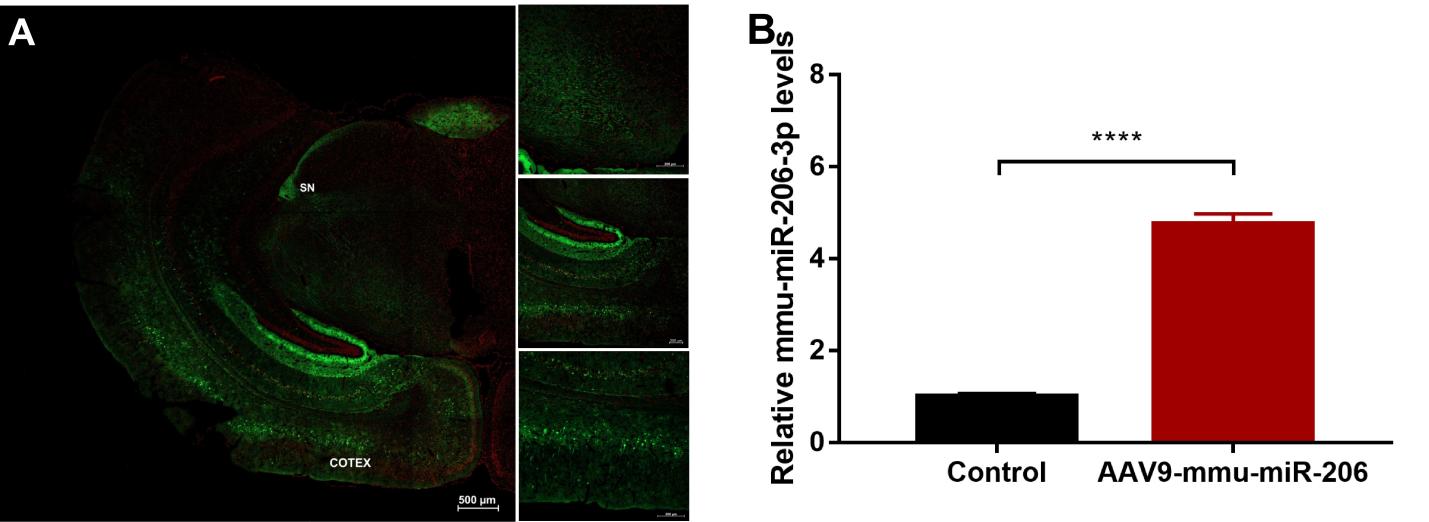


Supplementary Figure 2. Knockdown of miR-206-3p produces limited effects on open-field locomotor behavior under basal conditions.

(A, B) Representative open-field movement tracks from control and miR-206-3p-knockdown mice. (C-H) Quantification of total distance, average movement speed, central-area/total-path ratio, time spent moving in the central area, time spent moving in the outer ring, and rearing counts.


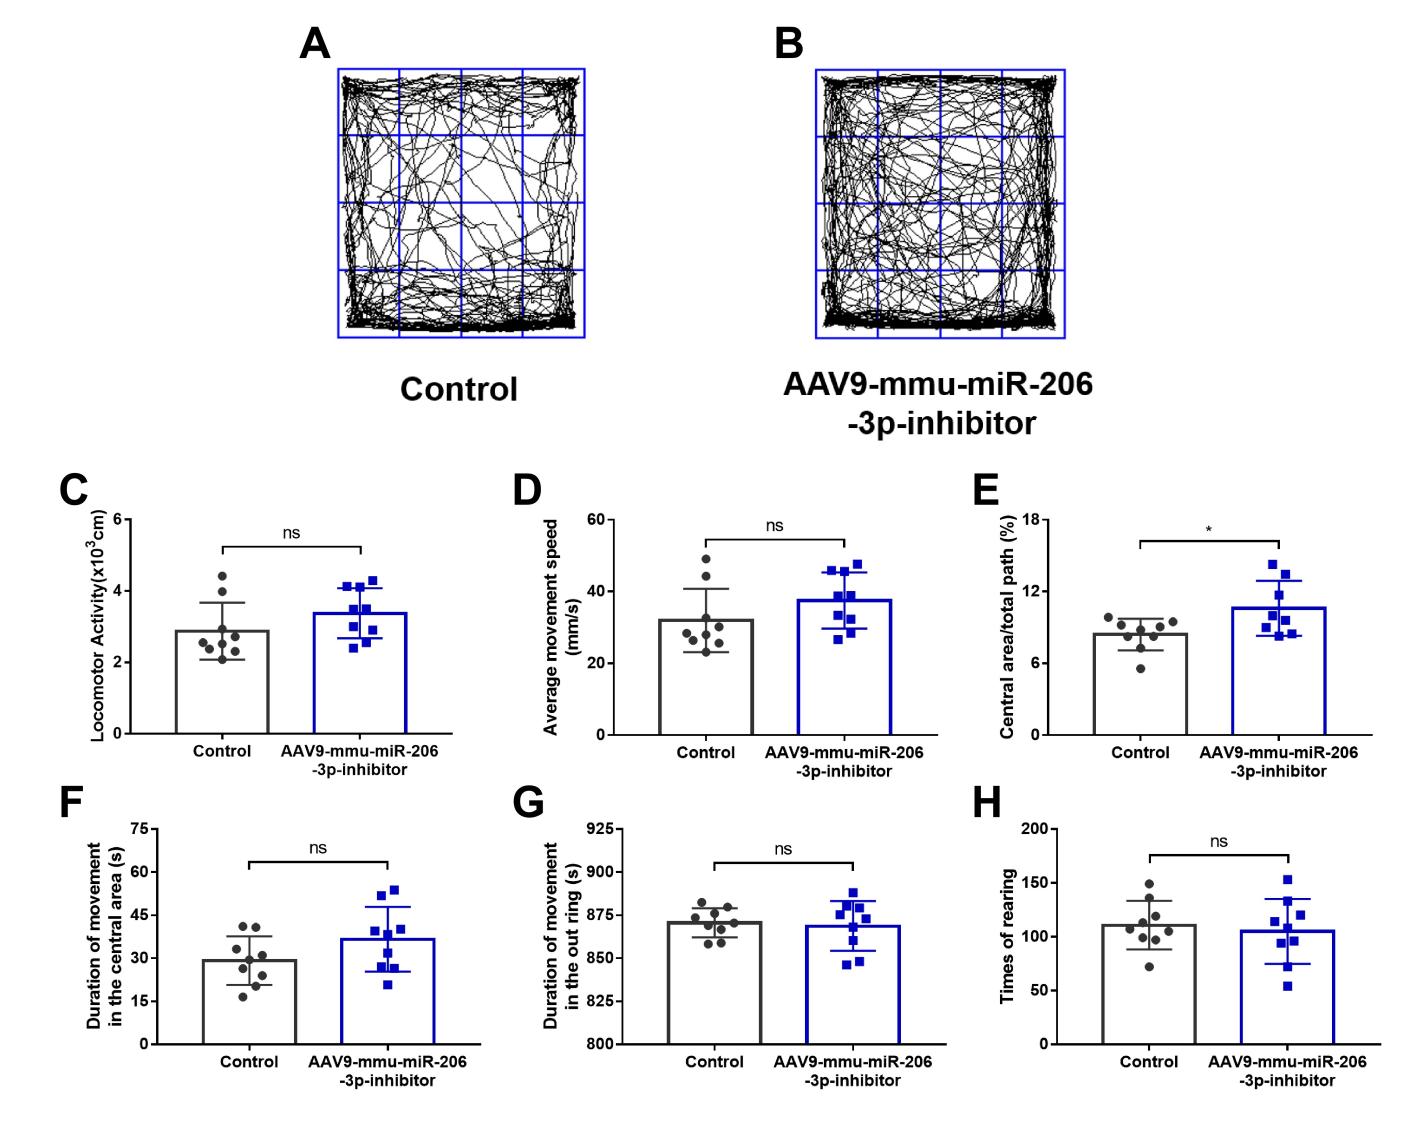


Supplementary Figure 3. Morris water maze analysis after miR-206-3p overexpression.

1. Representative swimming paths in the Morris water maze. (B-D) Quantification of swimming distance, average speed, and escape latency during training. (E) Platform-crossing frequency after platform removal.

**
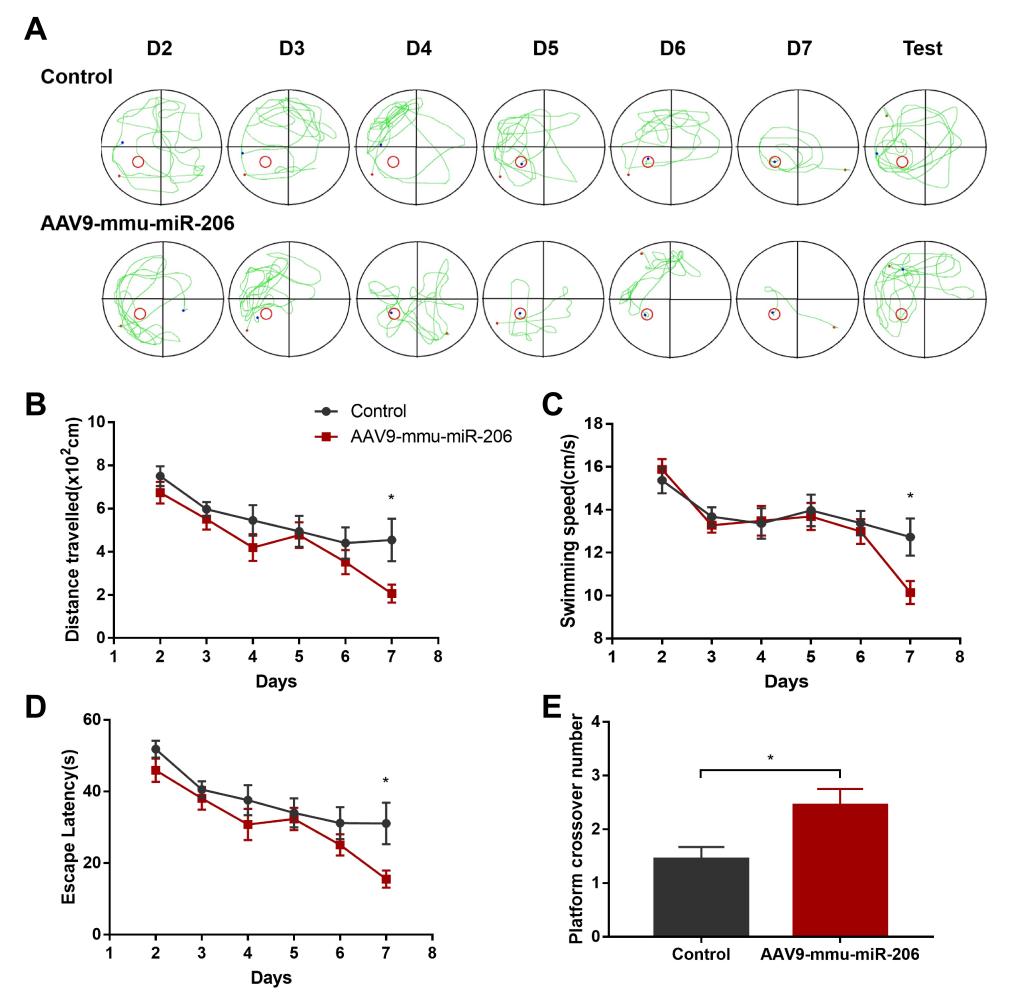
**

Supplementary Figure 4. Morris water maze analysis after miR-206-3p knockdown.

(A-D) Quantification of swimming distance, average speed, escape latency, and platform-crossing frequency in control and miR-206-3p-knockdown mice.


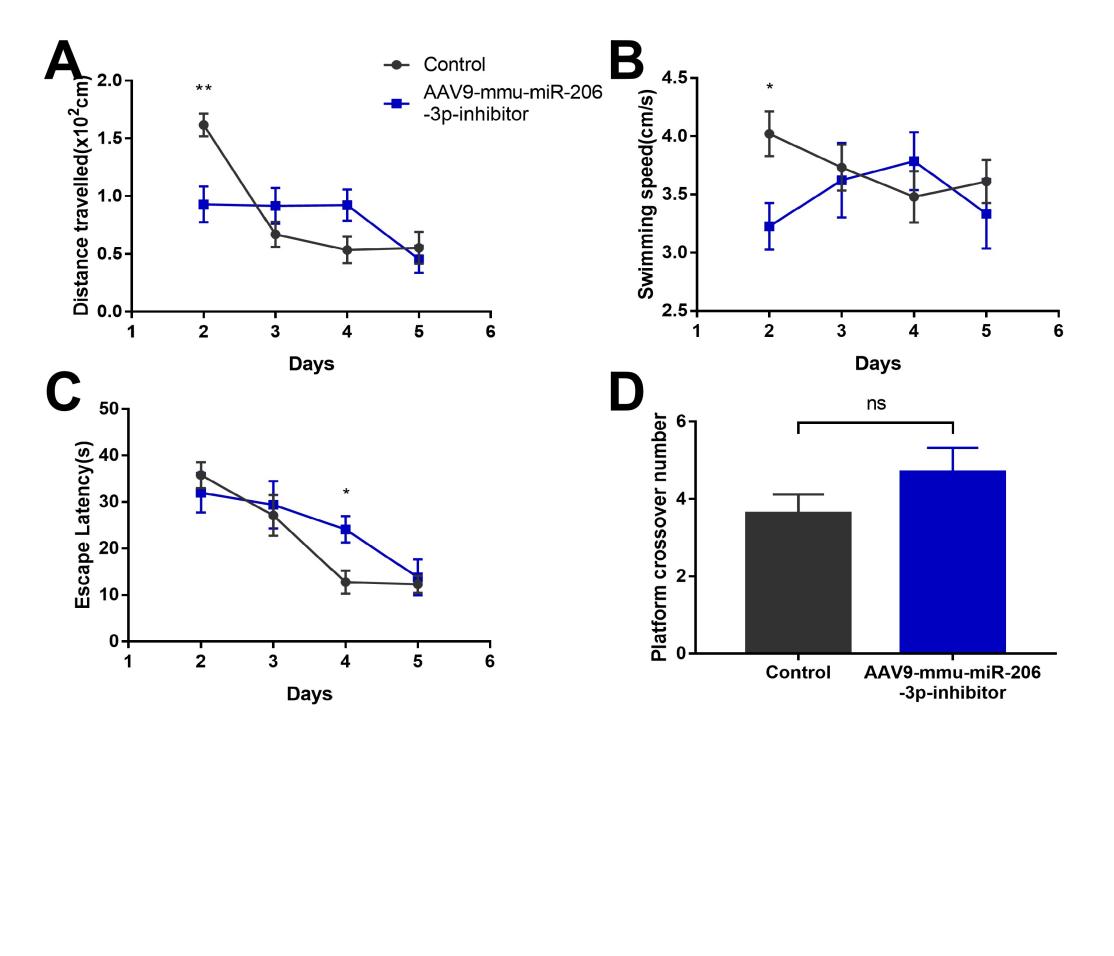


Supplementary Figure 5. Extended analysis of dopamine-related gene-expression changes.

(A-F) qPCR analysis of *Dat1, Th, Vmat2, Drd1, Manf,* and *Lphn2* expression in mouse brain. These data complement the dopamine homeostasis results presented in Figure 7.


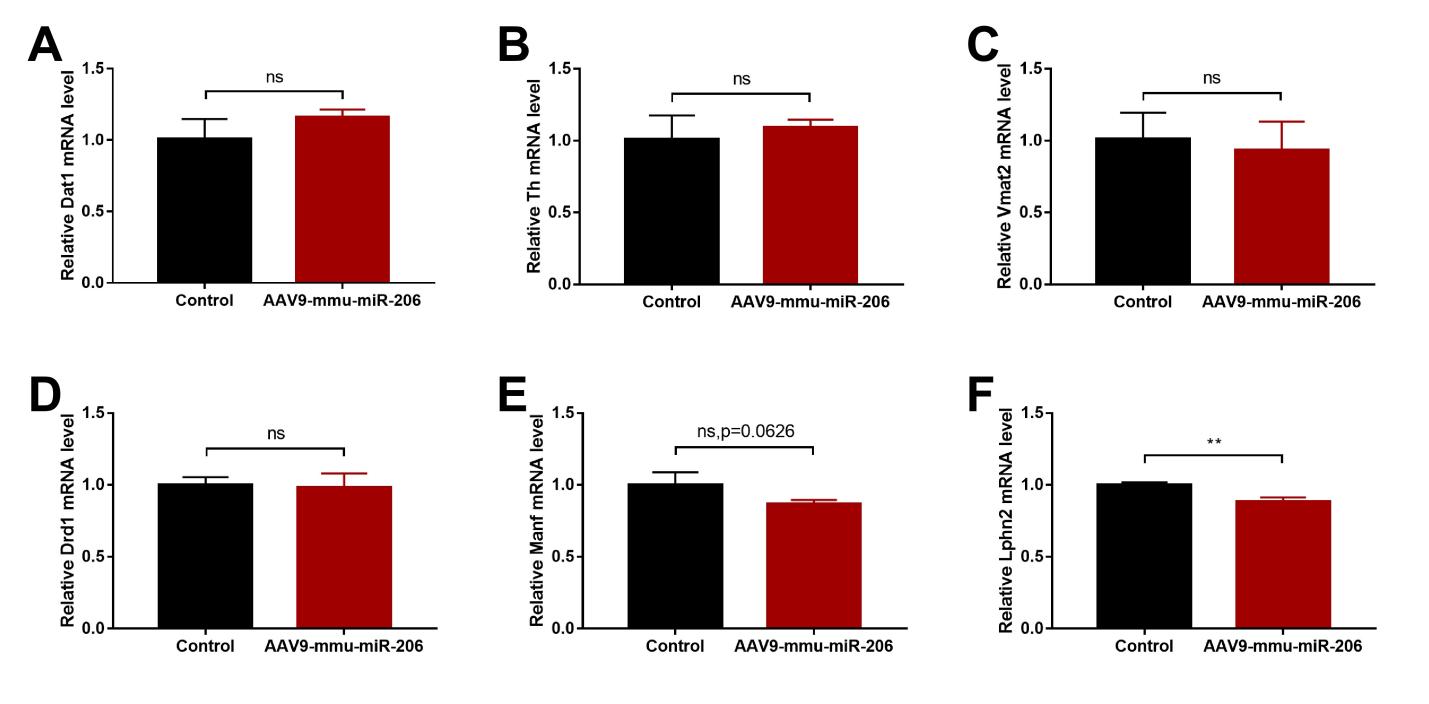


Supplementary Figure 6. Extended circadian gene-expression analysis.

(A-D) qPCR analysis of *Bmal*, *Clock*, *Cry1*, and *Cry2* expression in mouse brain. (E-G) qPCR analysis of *Per1, Per2*, and *Per3* expression. These data complement the main dopamine-related molecular analysis shown in Figure 7.


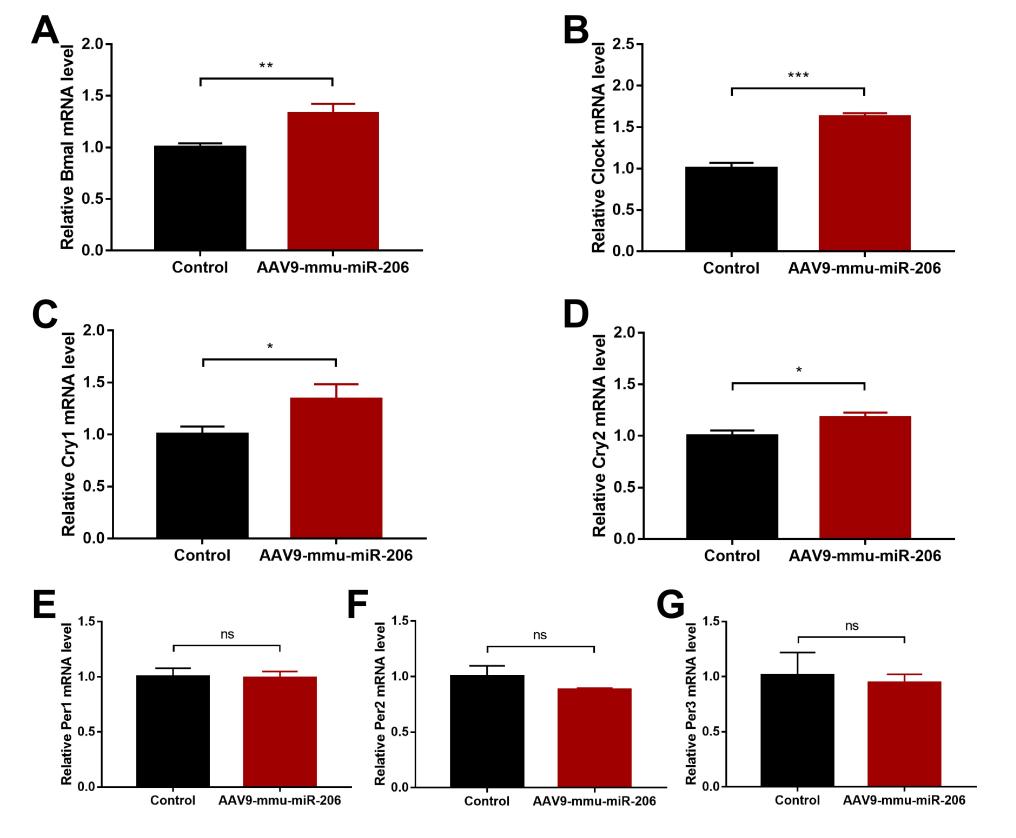


Supplementary Figure 7. RNA-seq enrichment analysis after miR-206-3p overexpression.

(A) Differentially expressed genes associated with biological rhythmic processes in the brains of miR-206-3p-overexpressing mice. (B, C) Gene Ontology enrichment analysis identifying downregulated genes related to tyrosine metabolism and upregulated genes associated with nervous system development and function.


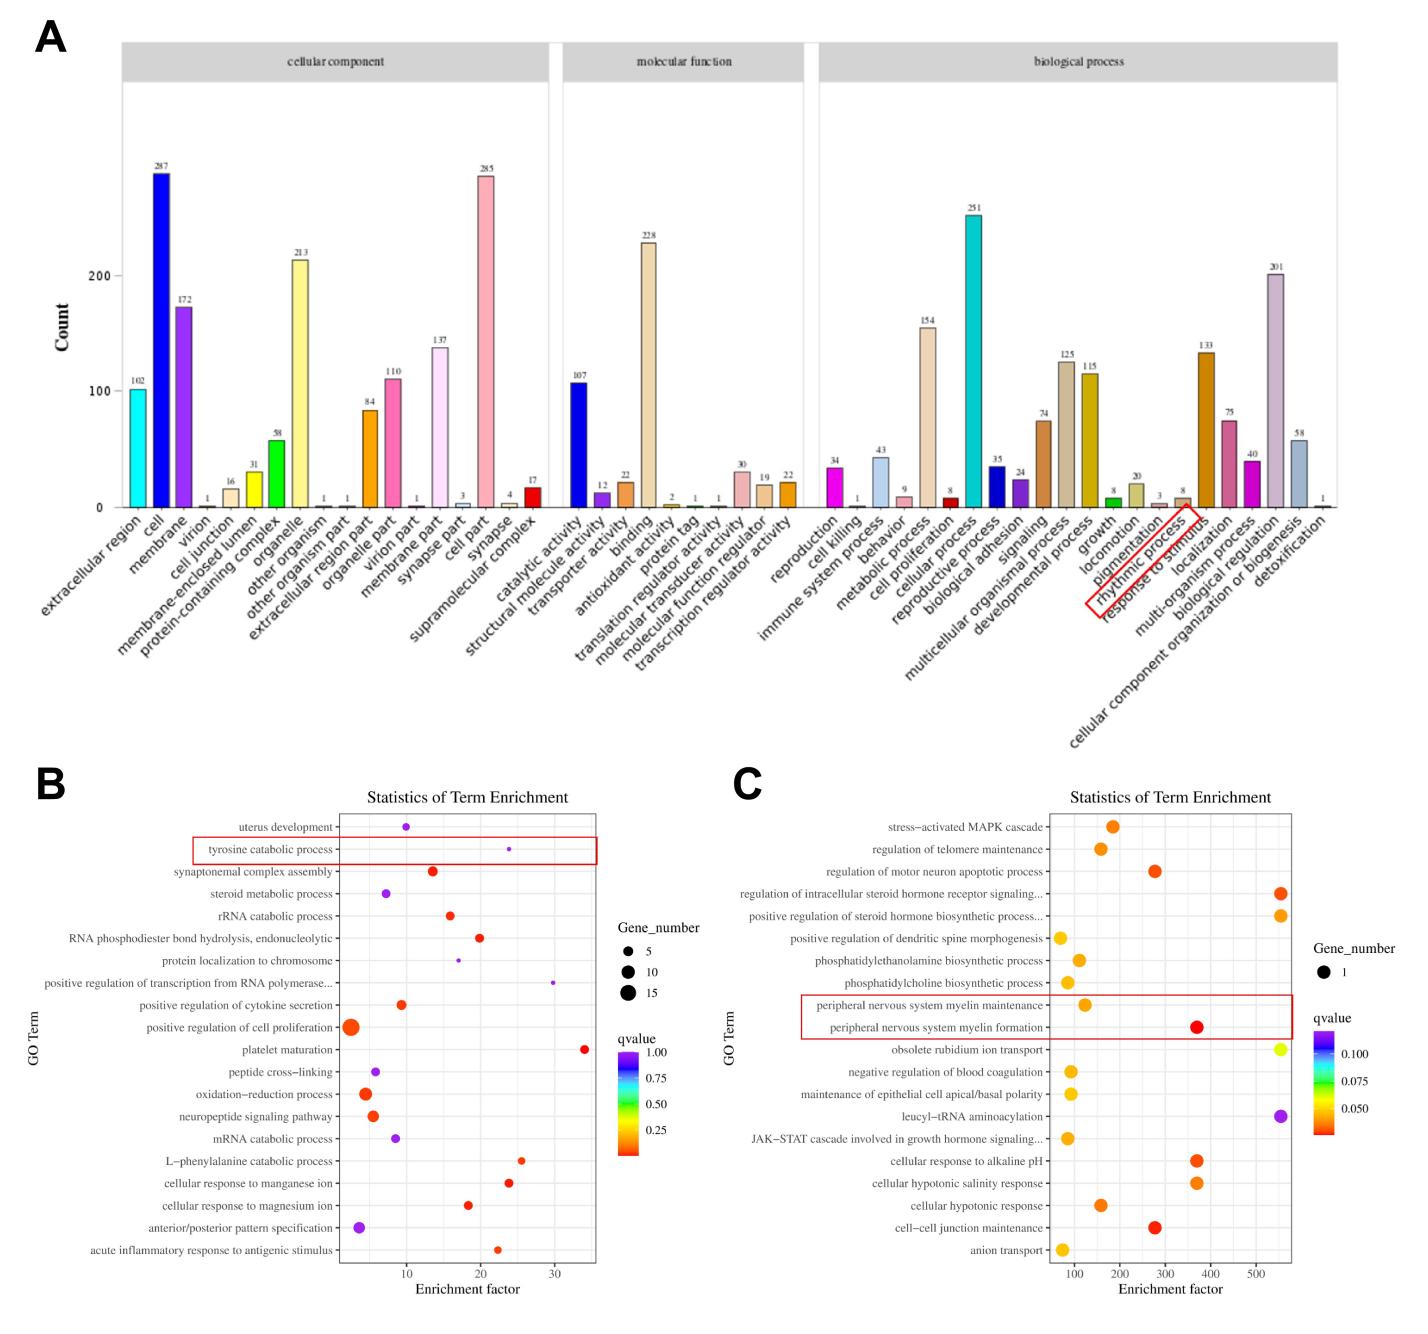


Supplementary table 1. q-PCR primers used in this study.

| **NAME** | **SEQUENCE** |
| --- | --- |
| mVmat2-F | AGGGGACACCTCTTACGACC |
| mVmat2-R | CTGCCACTTTCGGGAACACA |
| mDat1-F | TTCATGGTTATTGCCGGGATG |
| mDat1-R | TGTAGAAGAAGCCCACGTAGAA |
| mDbh-F | GAGGCGGCTTCCATGTACG |
| mDbh-R | TCCAGGGGGATGTGGTAGG |
| mDrd1-F | GTGGGCGAATTCTTCCCTGA |
| mDrd1-R | GGGCAGAGTCTGTAGCATCC |
| mDrd2-F | CGGCCTACATAGCAACCCTG |
| mDrd2-R | TTTCTGCGGCTCATCGTCTT |
| mDrd4-F | GCCTGGAGAACCGAGACTATG |
| mDrd4-R | CGGCTGTGAAGTTTGGTGTG |
| mMaoa-F | GTGAATGTCAATGAGCGTCTAGT |
| mMaoa-R | TCAACAGGGATCTCTTTTCCCA |
| mMaob-F | AACAAAAGCGATGTGATCGTGG |
| mMaob-R | GCCCAACATAAGATCCTCCAAGG |
| mManf-F | TCTGGGACGATTTTACCAGGA |
| mManf-R | CTTGCTTCACGGCAAAACTTT |
| mLphn2-F | GCCTTACCATTCGGGTTAGTTAG |
| mLphn2-R | CGTAGTTCGCACTCTCGATCAT |
| mLphn3-F | AACGGCTCATCGAGGACAG |
| mLphn3-R | GCTCAATGGGGTAGCTCTCAC |
| mOtp-F | CAGGCTAGGTATGAAAGATGCC |
| mOtp-R | GAAGCAGGGGTAGAGCCCA |
| mBmal-F | ACAGTCAGATTGAAAAGAGGCG |
| mBmal-R | GCCATCCTTAGCACGGTGAG |
| mClock-F | CTTCCTGGTAACGCGAGAAAG |
| mClock-R | GTCGAATCTCACTAGCATCTGAC |
| mCry1-F | CACTGGTTCCGAAAGGGACTC |
| mCry1-R | CTGAAGCAAAAATCGCCACCT |
| mCry2-F | CACTGGTTCCGCAAAGGACTA |
| mCry2-R | CCACGGGTCGAGGATGTAGA |
| mPer1-F | GATGTGGGTGTCTTCTATGGC |
| mPer1-R | AGGACCTCCTCTGATTCGGC |
| mPer2-F | AAAGCTGACGCACACAAAGAA |
| mPer2-R | ACTCCTCATTAGCCTTCACCT |
| mPer3-F | TCAAGACGTGAGGGCGTTCTA |
| mPer3-R | CATTCATACTGCGAGGCTCTTT |
